# Supplementary material
Source: PubMed Central journal article supplement (PMC7240635)
Supplement: jamadermatol-156-780-s001.pdf [file jamadermatol-156-780-s001.pdf]

## Supplementary Online Content

Andersen RK, Jørgensen IF, Reguant R, Jemec GBE, Brunak S. Disease trajectories for hidradenitis suppurativa in the Danish population. *JAMA Dermatol*. Published online May 20, 2020. doi:10.1001/jamadermatol.2020.1281

**eTable 1.** Procedural Codes Relevant for HS

**eTable 2.** How Common the Trajectories With Min 100 Patients (4.55%) Found Through *ICD-10* Codes Alone, are Amongst Those Identified by the Procedure Codes Algorithm

**eTable 3.** How Common the Trajectories With Min 23 Patients (11.31%) Found Through the Procedure Code Algorithm, are Amongst Those Identified by *ICD-10* Codes Alone

**eTable 4.** Differences in Diagnosis Received for the Deceased vs Those Alive in the *ICD-10* Group by the End of the Study

**eTable 5.** Differences in Diagnosis Received for the Deceased vs Those Alive in the Proxy Group by the End of the Study

**eTable 6.** Disease Development and Yearly Rates in the Procedure Group Based on Follow-up Time and Matched With the *ICD-10* Group

**eFigure 1.** Disease Trajectory Network Experienced by the HS Group Identified From the Danish National Patient Registry

**eFigure 2.** Disease Trajectory Network Experienced by the Proxy HS Group Identified Through the Algorithm

**eFigure 3.** *ICD10* HS Group Where the Diagnosis of HS Were Artificially Delayed by 6 Months

This supplementary material has been provided by the authors to give readers additional information about their work.

| <b>eTable 1. Procedural Codes Relevant for HS</b>                                               |                          |                                  |
|-------------------------------------------------------------------------------------------------|--------------------------|----------------------------------|
| <b>Name of procedure</b>                                                                        | <b>Code of procedure</b> | <b>Number of times performed</b> |
| Likely HS procedural codes                                                                      |                          |                                  |
| <b>Incision and drainage of abscess in mamma</b>                                                | KTHA40                   | 2930 times                       |
| <b>Incision of pilonidal cyst</b>                                                               | KQBA10B                  | 10684 times                      |
| <b>Minor incision of soft tissue in pelvic</b>                                                  | KTNE05                   | 34 times                         |
| <b>Incision of perianal abscess</b>                                                             | KJHA00A                  | 17167 times                      |
| <b>Incision in vulva and perineum</b>                                                           | KLFA00                   | 15742 times                      |
| Less likely HS procedural codes                                                                 |                          |                                  |
| <b>Incision of skin on the upper limb</b>                                                       | KQCA10                   | 18488 times                      |
| <b>Incision of skin without further specification of localization</b>                           | KQXA10                   | 356 times                        |
| <b>Insertion of surgical drain into the subcutaneous skin of the upper limb</b>                 | KQCA10A                  | 120 times                        |
| LEGEND: Distribution of the chosen procedural codes used in the algorithm to define ‘proxy HS’. |                          |                                  |

| <b>eTable 2.</b>                                                                                                                                                                              |                                                                                                |                                         |                                              |                                                |                          |                                              |                                                |                          |
|-----------------------------------------------------------------------------------------------------------------------------------------------------------------------------------------------|------------------------------------------------------------------------------------------------|-----------------------------------------|----------------------------------------------|------------------------------------------------|--------------------------|----------------------------------------------|------------------------------------------------|--------------------------|
| How Common the Trajectories with Min 100 Patients (4.55%) Found Through ICD-10 Codes Alone, are Amongst Those Identified by the Procedure Codes Algorithm                                     |                                                                                                |                                         |                                              |                                                |                          |                                              |                                                |                          |
| ICD-10 Identified                                                                                                                                                                             |                                                                                                |                                         | Procedure codes                              |                                                |                          | Procedure codes minus K61 & L05              |                                                |                          |
| Place                                                                                                                                                                                         | Trajectory by ICD-10 codes                                                                     | N (%) amongst ICD-10 codes trajectories | Trajectory placed amongst top X trajectories | Place If trajectory order of HS did not matter | That trajectory order is | Trajectory placed amongst top X trajectories | Place If trajectory order of HS did not matter | That trajectory order is |
| 1                                                                                                                                                                                             | L02:L73:E66                                                                                    | 423 (3.55)                              | 21.75 %                                      |                                                |                          | 13.29 %                                      |                                                |                          |
| 2                                                                                                                                                                                             | L02:L73:I10                                                                                    | 375 (3.14)                              |                                              | 15.19 %                                        | L02:I10:L76              |                                              | 8.74 %                                         | L02:I10:L76              |
| 3                                                                                                                                                                                             | L02:L73:F17                                                                                    | 279 (2.34)                              | 23.83 %                                      |                                                |                          | 15.77 %                                      |                                                |                          |
| 4                                                                                                                                                                                             | L02:L73:E11                                                                                    | 238 (2.0)                               | 39.67 %                                      |                                                |                          | 29.09 %                                      |                                                |                          |
| 5                                                                                                                                                                                             | L02:L73:J18                                                                                    | 219 (1.84)                              | 49.12 %                                      |                                                |                          | 38.43 %                                      |                                                |                          |
| 6                                                                                                                                                                                             | L02:L73:E78                                                                                    | 211 (1.77)                              | Not part of the trajectories                 |                                                |                          | Not part of the trajectories                 |                                                |                          |
| 7                                                                                                                                                                                             | F10:L02:L73                                                                                    | 206 (1.73)                              | 6.68 %                                       |                                                |                          | 2.6 %                                        |                                                |                          |
| 8                                                                                                                                                                                             | R10:N76:L73                                                                                    | 175 (1.47)                              | 1.36 %                                       |                                                |                          | 1.94 %                                       |                                                |                          |
| 9                                                                                                                                                                                             | L02:L73:J44                                                                                    | 172 (1.44)                              | 82.36 %                                      |                                                |                          | 77.57 %                                      |                                                |                          |
| 10                                                                                                                                                                                            | F43:F60:L73                                                                                    | 159 (1.33)                              | 82.36 %                                      |                                                |                          | 77.57 %                                      |                                                |                          |
| 11                                                                                                                                                                                            | L02:L73:G56                                                                                    | 158 (1.32)                              | 43.85 %                                      |                                                |                          | 33.19 %                                      |                                                |                          |
| 12                                                                                                                                                                                            | M62:L02:L73                                                                                    | 158 (1.32)                              | 11.53 %                                      |                                                |                          | 5.5 %                                        |                                                |                          |
| 13                                                                                                                                                                                            | L73:I21:I25                                                                                    | 149 (1.25)                              | Not part of the trajectories                 |                                                |                          | Not part of the trajectories                 |                                                |                          |
| 14                                                                                                                                                                                            | N92:L02:L73                                                                                    | 147 (1.23)                              | 12.42 %                                      |                                                |                          | 6.35 %                                       |                                                |                          |
| 15                                                                                                                                                                                            | L73:E66:R52                                                                                    | 140 (1.17)                              | Not part of the trajectories                 |                                                |                          | Not part of the trajectories                 |                                                |                          |
| 16                                                                                                                                                                                            | L73:I10:J18                                                                                    | 138 (1.16)                              | Not part of the trajectories                 |                                                |                          | Not part of the trajectories                 |                                                |                          |
| 17                                                                                                                                                                                            | J45:L02:L73                                                                                    | 136 (1.14)                              | 12.12 %                                      |                                                |                          | 5.92 %                                       |                                                |                          |
| 18                                                                                                                                                                                            | L73:I10:R06                                                                                    | 134 (1.12)                              | Not part of the trajectories                 |                                                |                          | Not part of the trajectories                 |                                                |                          |
| 19                                                                                                                                                                                            | J35:L02:L73                                                                                    | 133 (1.11)                              | 16.16 %                                      |                                                |                          | 9.44 %                                       |                                                |                          |
| 20                                                                                                                                                                                            | L02:L73:G47                                                                                    | 128 (1.07)                              | Not part of the trajectories                 |                                                |                          | Not part of the trajectories                 |                                                |                          |
| 21                                                                                                                                                                                            | L73:I10:R07                                                                                    | 127 (1.06)                              | Not part of the trajectories                 |                                                |                          | Not part of the trajectories                 |                                                |                          |
| 22                                                                                                                                                                                            | F60:L02:L73                                                                                    | 126 (1.06)                              | 18.99 %                                      |                                                |                          | 11.6 %                                       |                                                |                          |
| 23                                                                                                                                                                                            | L02:L73:D12                                                                                    | 123 (1.03)                              | Not part of the trajectories                 |                                                |                          | Not part of the trajectories                 |                                                |                          |
| 24                                                                                                                                                                                            | L73:E11:E10                                                                                    | 121 (1.01)                              |                                              | 9.17 %                                         | E11:E10:L76              |                                              | 3.13 %                                         | E11:E10:L76              |
| 25                                                                                                                                                                                            | L02:L73:I25                                                                                    | 118 (0.99)                              | Not part of the trajectories                 |                                                |                          | Not part of the trajectories                 |                                                |                          |
| 26                                                                                                                                                                                            | N76:L73:E66                                                                                    | 118 (0.99)                              | 28.86 %                                      |                                                |                          | 19.55 %                                      |                                                |                          |
| 27                                                                                                                                                                                            | L73:J18:J96                                                                                    | 116 (0.97)                              | Not part of the trajectories                 |                                                |                          | Not part of the trajectories                 |                                                |                          |
| 28                                                                                                                                                                                            | L73:E66:R06                                                                                    | 108 (0.91)                              | Not part of the trajectories                 |                                                |                          | Not part of the trajectories                 |                                                |                          |
| 29                                                                                                                                                                                            | L73:J18:R06                                                                                    | 105 (0.88)                              | Not part of the trajectories                 |                                                |                          | Not part of the trajectories                 |                                                |                          |
| 30                                                                                                                                                                                            | F32:F60:L73                                                                                    | 104 (0.87)                              | Not part of the trajectories                 |                                                |                          | Not part of the trajectories                 |                                                |                          |
| 31                                                                                                                                                                                            | E10:L02:L73                                                                                    | 102 (0.86)                              | 14.40 %                                      |                                                |                          | 8.36 %                                       |                                                |                          |
| 32                                                                                                                                                                                            | L73:J44:J96                                                                                    | 102 (0.86)                              | Not part of the trajectories                 |                                                |                          | Not part of the trajectories                 |                                                |                          |
| 33                                                                                                                                                                                            | N97:L02:L73                                                                                    | 101 (0.85)                              | 22.65 %                                      |                                                |                          | 14.32 %                                      |                                                |                          |
| In total:                                                                                                                                                                                     | 19 out of 33 trajectories could be found amongst the procedure patients – they make up 66.29 % |                                         |                                              |                                                |                          |                                              |                                                |                          |
|                                                                                                                                                                                               | Average trajectory placed amongst top                                                          |                                         |                                              | 52.59 %                                        |                          | 46.93 %                                      |                                                |                          |
|                                                                                                                                                                                               | For those trajectories that could be found                                                     |                                         |                                              | 26.98 %                                        |                          | 19.95 %                                      |                                                |                          |
| LEGEND: How common the trajectories clustered in Figure 1 are amongst the trajectories found through the algorithm, and an algorithm-subgroup where ICD-10 diagnoses L05 and K61 are removed. |                                                                                                |                                         |                                              |                                                |                          |                                              |                                                |                          |

**eTable 3.** How Common the Trajectories With Min 23 Patients (11.31%) Found Through the Procedure Code Algorithm, are Amongst Those Identified by ICD-10 Codes Alone.

| Procedure codes |                                                                                             |                                         | ICD-10 Identified                            |                                                |                          |
|-----------------|---------------------------------------------------------------------------------------------|-----------------------------------------|----------------------------------------------|------------------------------------------------|--------------------------|
| Place           | Trajectory from algorithm defined group                                                     | N (%) amongst ICD-10 codes trajectories | Trajectory placed amongst top X trajectories | Place If trajectory order of HS did not matter | That trajectory order is |
| 1               | R10:N76:L76                                                                                 | 146 (5.23)                              | 1.77 %                                       |                                                |                          |
| 2               | F10:K61:L76                                                                                 | 89 (3.19)                               | 7.66 %                                       |                                                |                          |
| 3               | M62:K61:L76                                                                                 | 71 (2.54)                               | 14.37 %                                      |                                                |                          |
| 4               | J35:L05:L76                                                                                 | 63 (2.26)                               | 33.08 %                                      |                                                |                          |
| 5               | J45:L05:L76                                                                                 | 62 (2.22)                               | 48.1 %                                       |                                                |                          |
| 6               | K51:K61:L76                                                                                 | 62 (2.22)                               | 40.06 %                                      |                                                |                          |
| 7               | I84:K61:L76                                                                                 | 61 (2.19)                               | 34.71 %                                      |                                                |                          |
| 8               | K61:R10:L76                                                                                 | 59 (2.11)                               | Not part of the trajectories                 |                                                |                          |
| 9               | J35:K61:L76                                                                                 | 56 (2.01)                               | 45.49 %                                      |                                                |                          |
| 10              | F10:L02:L76                                                                                 | 50 (1.79)                               | 1.62 %                                       |                                                |                          |
| 11              | H10:K61:L76                                                                                 | 50 (1.79)                               | 39.68 %                                      |                                                |                          |
| 12              | F10:L05:L76                                                                                 | 46 (1.65)                               | 11.91 %                                      |                                                |                          |
| 13              | K61:K60:R62                                                                                 | 46 (1.65)                               | Not part of the trajectories                 |                                                |                          |
| 14              | A09:L05:L76                                                                                 | 44 (1.57)                               | 65.47 %                                      |                                                |                          |
| 15              | M22:K61:L76                                                                                 | 43 (1.54)                               | 35.16 %                                      |                                                |                          |
| 16              | E11:E10:L76                                                                                 | 40 (1.43)                               |                                              | 3.36 %                                         | L73:E11:E10              |
| 17              | K51:K61:K60                                                                                 | 39 (1.40)                               | 40.06 %                                      |                                                |                          |
| 18              | R10:F32:L76                                                                                 | 38 (1.36)                               | Not part of the trajectories                 |                                                |                          |
| 19              | K61:K60:E66                                                                                 | 37 (1.33)                               | 28.84 %                                      |                                                |                          |
| 20              | J45:R10:L76                                                                                 | 36 (1.29)                               | Not part of the trajectories                 |                                                |                          |
| 21              | F10:R10:L76                                                                                 | 35 (1.25)                               | Not part of the trajectories                 |                                                |                          |
| 22              | R10:M79:L76                                                                                 | 35 (1.25)                               | Not part of the trajectories                 |                                                |                          |
| 23              | M62:L02:L76                                                                                 | 34 (1.22)                               | 2.31 %                                       |                                                |                          |
| 24              | F60:K61:L76                                                                                 | 32 (1.15)                               | 17.91 %                                      |                                                |                          |
| 25              | J45:L02:L76                                                                                 | 32 (1.15)                               | 2.9 %                                        |                                                |                          |
| 26              | N92:L02:L76                                                                                 | 32 (1.15)                               | 2.55 %                                       |                                                |                          |
| 27              | F10:N76:L76                                                                                 | 31 (1.11)                               | 17.02                                        |                                                |                          |
| 28              | J35:N76:L76                                                                                 | 31 (1.11)                               | 17.97                                        |                                                |                          |
| 29              | K35:L05:L76                                                                                 | 31 (1.11)                               | 58.88 %                                      |                                                |                          |
| 30              | K50:L02:L76                                                                                 | 31 (1.11)                               | 12 %                                         |                                                |                          |
| 31              | H65:L05:L76                                                                                 | 30 (1.07)                               | 62.53 %                                      |                                                |                          |
| 32              | N70:N76:L76                                                                                 | 30 (1.07)                               | 20.29 %                                      |                                                |                          |
| 33              | E10:L02:L76                                                                                 | 29 (1.04)                               | 4.28 %                                       |                                                |                          |
| 34              | L05:N76:L76                                                                                 | 29 (1.04)                               | 14.78 %                                      |                                                |                          |
| 35              | H65:K61:L76                                                                                 | 28 (1.00)                               | 39.7 %                                       |                                                |                          |
| 36              | L02:I10:L76                                                                                 | 28 (1.00)                               |                                              | 0.66 %                                         | L02:L73:I10              |
| 37              | M23:R10:L76                                                                                 | 28 (1.00)                               | Not part of the trajectories                 |                                                |                          |
| 38              | F10:K61:K60                                                                                 | 26 (0.93)                               | 18.61 %                                      |                                                |                          |
| 39              | M22:L05:L76                                                                                 | 26 (0.93)                               | 43.15 %                                      |                                                |                          |
| 40              | J35:L02:L76                                                                                 | 25 (0.90)                               | 3.12 %                                       |                                                |                          |
| 41              | K61:R10:R52                                                                                 | 25 (0.90)                               | Not part of the trajectories                 |                                                |                          |
| 42              | M62:K61:F17                                                                                 | 25 (0.90)                               | 23.37 %                                      |                                                |                          |
| 43              | R10:N76:L73                                                                                 | 25 (0.90)                               | 1.77 %                                       |                                                |                          |
| 44              | M22:N76:L76                                                                                 | 24 (0.86)                               | 20.21 %                                      |                                                |                          |
| 45              | F10:K61:F17                                                                                 | 23 (0.82)                               | 15.5 %                                       |                                                |                          |
| 46              | H10:L05:L76                                                                                 | 23 (0.82)                               | 47.76 %                                      |                                                |                          |
| 47              | I84:K61:K60                                                                                 | 23 (0.82)                               | 70.54 %                                      |                                                |                          |
| 48              | I84:L02:L76                                                                                 | 23 (0.82)                               | 7.77 %                                       |                                                |                          |
| 49              | K35:K61:L76                                                                                 | 23 (0.82)                               | 42.51 %                                      |                                                |                          |
| 50              | K35:L02:L76                                                                                 | 23 (0.82)                               | 7.12 %                                       |                                                |                          |
| 51              | K51:L02:L76                                                                                 | 23 (0.82)                               | 13.21 %                                      |                                                |                          |
| 52              | M62:I10:L76                                                                                 | 23 (0.82)                               |                                              | 7.31 %                                         | M62:L73:I10              |
| In total:       | 44 out of 52 trajectories could be found amongst the ICD-10 patients – they make up 85.08 % |                                         |                                              |                                                |                          |

|                                                                                                                                |                                            |         |
|--------------------------------------------------------------------------------------------------------------------------------|--------------------------------------------|---------|
|                                                                                                                                | Average trajectory placed amongst top      | 34.63 % |
|                                                                                                                                | For those trajectories that could be found | 23.16 % |
| LEGEND: How common the trajectories clustered in Figure 2 are amongst the trajectories found solely through ICD-10 codes alone |                                            |         |

**eTable 4.** Differences in Diagnosis Received for the Deceased vs. Those Alive in the *ICD-10* Group by the End of the Study

| <b>Variables</b>                                                                                                                          | <b>Deceased HS patients</b> | <b>HS patients alive at end of study</b> | <b>Subgroup alive and older than 52 years by the end of study</b> |
|-------------------------------------------------------------------------------------------------------------------------------------------|-----------------------------|------------------------------------------|-------------------------------------------------------------------|
| <b>Amount</b>                                                                                                                             | 954                         | 10,975                                   | 4,098                                                             |
| <b>Age at death / end of study for those still alive, median (IQR)</b>                                                                    | 59 (50.7 : 68.7)            | 47.7 (38.6 : 56.5)                       | 59.6 (55.3 : 65.5)                                                |
| <b>Diagnose I21, n (%)</b>                                                                                                                | 100 (10.48)                 | 266 (2.42)                               | 192 (4.69)                                                        |
| <b>Diagnose I25, n (%)</b>                                                                                                                | 162 (16.98)                 | 387 (3.53)                               | 306 (7.47)                                                        |
| <b>Diagnose J44, n (%)</b>                                                                                                                | 225 (23.58)                 | 524 (4.77)                               | 408 (9.96)                                                        |
| <b>Diagnose J18, n (%)</b>                                                                                                                | 320 (33.54)                 | 843 (7.68)                               | 457 (11.15)                                                       |
| <b>Diagnose J96, n (%)</b>                                                                                                                | 170 (17.82)                 | 185 (1.69)                               | 128 (3.12)                                                        |
| LEGEND: The subgroup alive and older than 52 by the end of the study were created to best match the deceased patients of the ICD-10 group |                             |                                          |                                                                   |

**eTable 5.** Differences in Diagnosis Received for the Deceased vs Those Alive in the Proxy Group by the End of the Study

| <b>Variables</b>                                                       | <b>Deceased HS patients</b> | <b>HS patients alive at end of study</b> | <b>Subgroup alive and older than 59 years by the end of study</b> |
|------------------------------------------------------------------------|-----------------------------|------------------------------------------|-------------------------------------------------------------------|
| <b>Amount</b>                                                          | 136                         | 2,655                                    | 383                                                               |
| <b>Age at death / end of study for those still alive, median (IQR)</b> | 66.3 (55.7 : 77.5)          | 40.5 (30 : 52.5)                         | 66.1 (62.1 : 67.2)                                                |
| <b>Diagnose I21, n (%)</b>                                             | 23 (16.91)                  | 63 (2.37)                                | 36 (9.40)                                                         |
| <b>Diagnose I25, n (%)</b>                                             | 27 (19.85)                  | 75 (2.82)                                | 48 (12.53)                                                        |
| <b>Diagnose J44, n (%)</b>                                             | 34 (25)                     | 90 (3.39)                                | 37 (9.66)                                                         |
| <b>Diagnose J18, n (%)</b>                                             | 37 (27.21)                  | 177 (6.67)                               | 51 (13.32)                                                        |
| <b>Diagnose J96, n (%)</b>                                             | 22 (16.18)                  | 36 (1.36)                                | 14 (3.66)                                                         |

LEGEND: The subgroup alive and older than 59 by the end of the study were created to best match the deceased patients of the proxy group

**eTable 6.** Disease Development and Yearly Rates in the Procedure Group Based on Follow-up Time and Matched With the *ICD-10* Group

| ICD-10 codes & names                                             | Procedure patients, N = 2,791              |                                                                        | Subgroup of procedure patients*, N = 1225  |                                                                         | ICD-10 codes patients, N = 11,929          |                                                                        |
|------------------------------------------------------------------|--------------------------------------------|------------------------------------------------------------------------|--------------------------------------------|-------------------------------------------------------------------------|--------------------------------------------|------------------------------------------------------------------------|
|                                                                  | N (%) [risk of occurrence per person-year] | N after HS diagnosis (% of total) [risk of occurrence per person-year] | N (%) [risk of occurrence per person-year] | N after HS diagnosis, (% of total) [risk of occurrence per person-year] | N (%) [risk of occurrence per person-year] | N after HS diagnosis (% of total) [risk of occurrence per person-year] |
| <b>Years followed</b>                                            | 67,737                                     | 16,193                                                                 | 29,731                                     | 12,758                                                                  | 289,517                                    | 138,225                                                                |
| <b>I21 Acute myocardial infarction</b>                           | 86 (3.08) [0.13]                           | 45 (52) [0.28]                                                         | 43 (3.51) [0.14]                           | 32 (74) [0.25]                                                          | 366 (3.07) [0.13]                          | 210 (57) [0.15]                                                        |
| <b>I25 Chronic ischemic heart disease</b>                        | 102 (3.65) [0.15]                          | 58 (57) [0.36]                                                         | 49 (4) [0.16]                              | 30 (61) [0.23]                                                          | 549 (4.60) [0.19]                          | 306 (56) [0.22]                                                        |
| <b>J44 Chronic obstructive pulmonary disease</b>                 | 124 (4.44) [0.18]                          | 78 (63) [0.48]                                                         | 60 (4.90) [0.20]                           | 39 (65) [0.31]                                                          | 749 (6.28) [0.26]                          | 416 (56) [0.30]                                                        |
| <b>J18 Pneumonia</b>                                             | 214 (7.67) [0.32]                          | 115 (54) [0.71]                                                        | 96 (7.84) [0.32]                           | 69 (72) [0.54]                                                          | 1163 (9.75) [0.40]                         | 631 (54) [0.46]                                                        |
| <b>J96 Respiratory failure</b>                                   | 58 (2.08) [0.09]                           | 37 (64) [0.23]                                                         | 24 (1.96) [0.08]                           | 15 (63) [0.12]                                                          | 355 (2.98) [0.12]                          | 187 (53) [0.14]                                                        |
| <b>R06 Abnormalities of breathing</b>                            | 204 (7.31) [0.30]                          | 124 (61) [0.77]                                                        | 88 (7.18) [0.30]                           | 54 (61) [0.42]                                                          | 1007 (8.44) [0.35]                         | 551 (55) [0.40]                                                        |
| <b>R07 Pain in throat and chest</b>                              | 151 (5.41) [0.22]                          | 89 (59) [0.55]                                                         | 78 (6.37) [0.26]                           | 50 (64) [0.39]                                                          | 685 (5.74) [0.24]                          | 373 (54) [0.27]                                                        |
| <b>G56 Mononeuropathies in upper limb</b>                        | 150 (5.37) [0.22]                          | 81 (54) [0.50]                                                         | 93 (7.59) [0.31]                           | 62 (67) [0.49]                                                          | 960 (8.05) [0.33]                          | 547 (57) [0.40]                                                        |
| <b>G47 Sleep disorders</b>                                       | 94 (3.37) [0.14]                           | 43 (46) [0.27]                                                         | 42 (3.43) [0.14]                           | 30 (71) [0.23]                                                          | 554 (4.64) [0.19]                          | 306 (55) [0.22]                                                        |
| <b>E78 Disorders of lipoprotein metabolism</b>                   | 173 (6.20) [0.26]                          | 99 (57) [0.61]                                                         | 86 (7.02) [0.29]                           | 56 (65) [0.44]                                                          | 907 (7.60) [0.31]                          | 498 (55) [0.36]                                                        |
| <b>D12 Benign neoplasm of colon, rectum, anus and anal canal</b> | 112 (4.01) [0.17]                          | 63 (56) [0.39]                                                         | 47 (3.84) [0.16]                           | 27 (57) [0.21]                                                          | 569 (4.77) [0.20]                          | 312 (55) [0.23]                                                        |

LEGEND: Full list of ICD-10 codes the same as Table 2, \* the 1225 procedure patients who were followed the longest after their proxy-HS-diagnosis have a median follow period of 10.4 years, and inter quartile range of 7.08 : 13.69 years.



**eFigure 1.** Disease Trajectory Network Experienced by the HS Group Identified From the Danish National Patient Registry

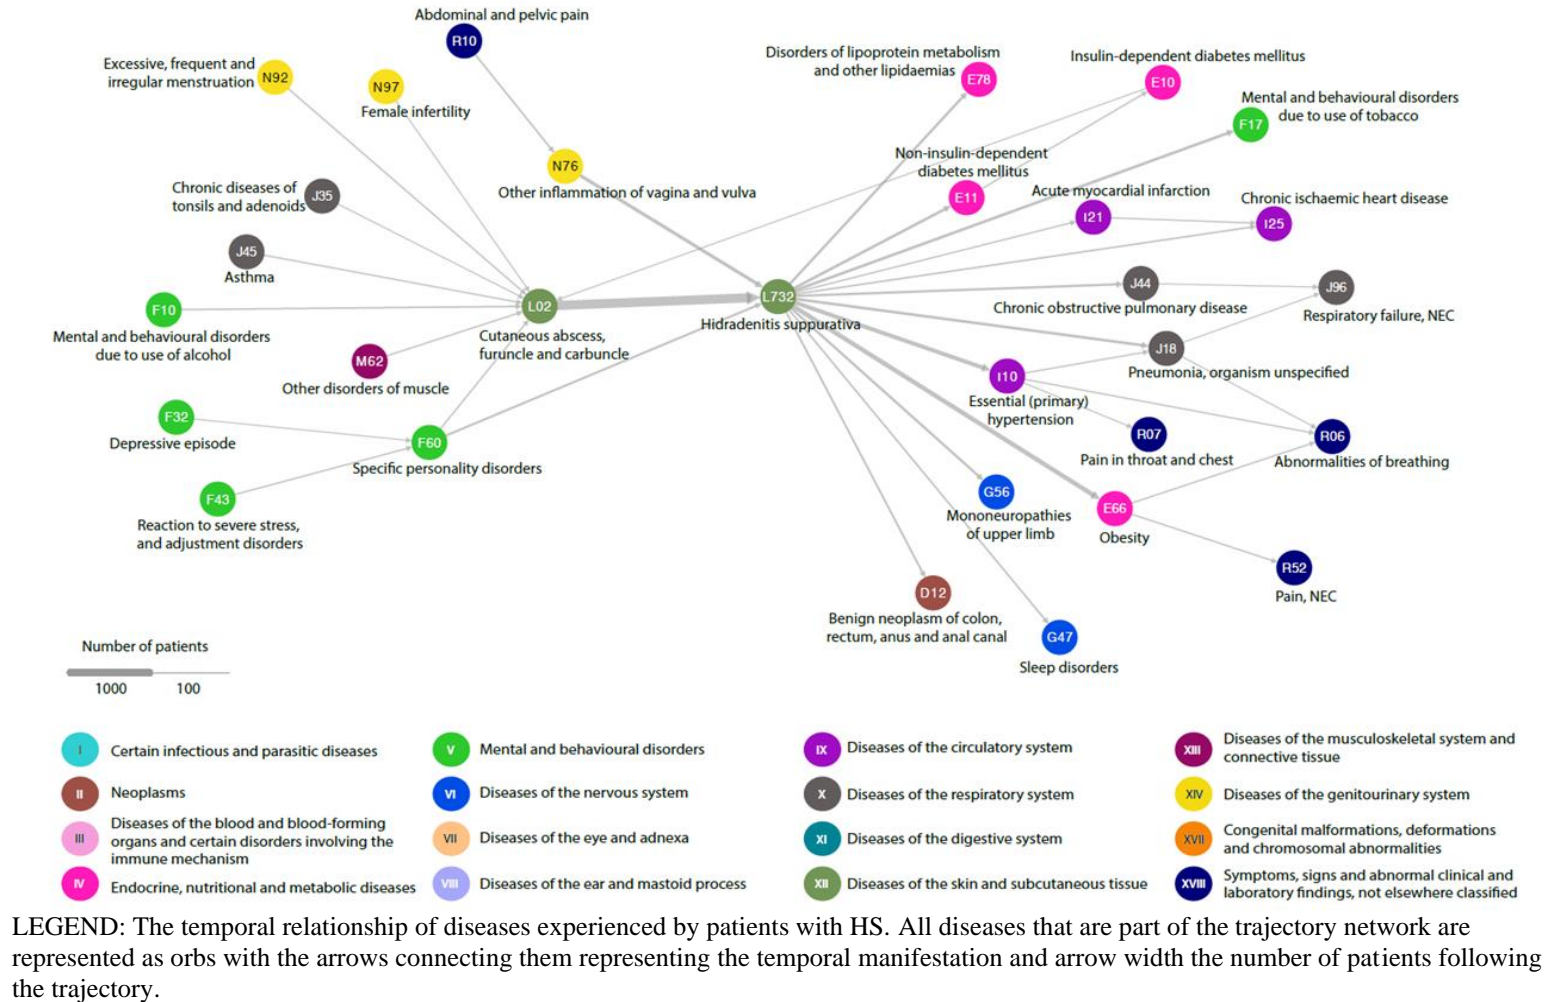

**eFigure 2.** Disease Trajectory Network Experienced by the Proxy HS Group Identified Through the Algorithm

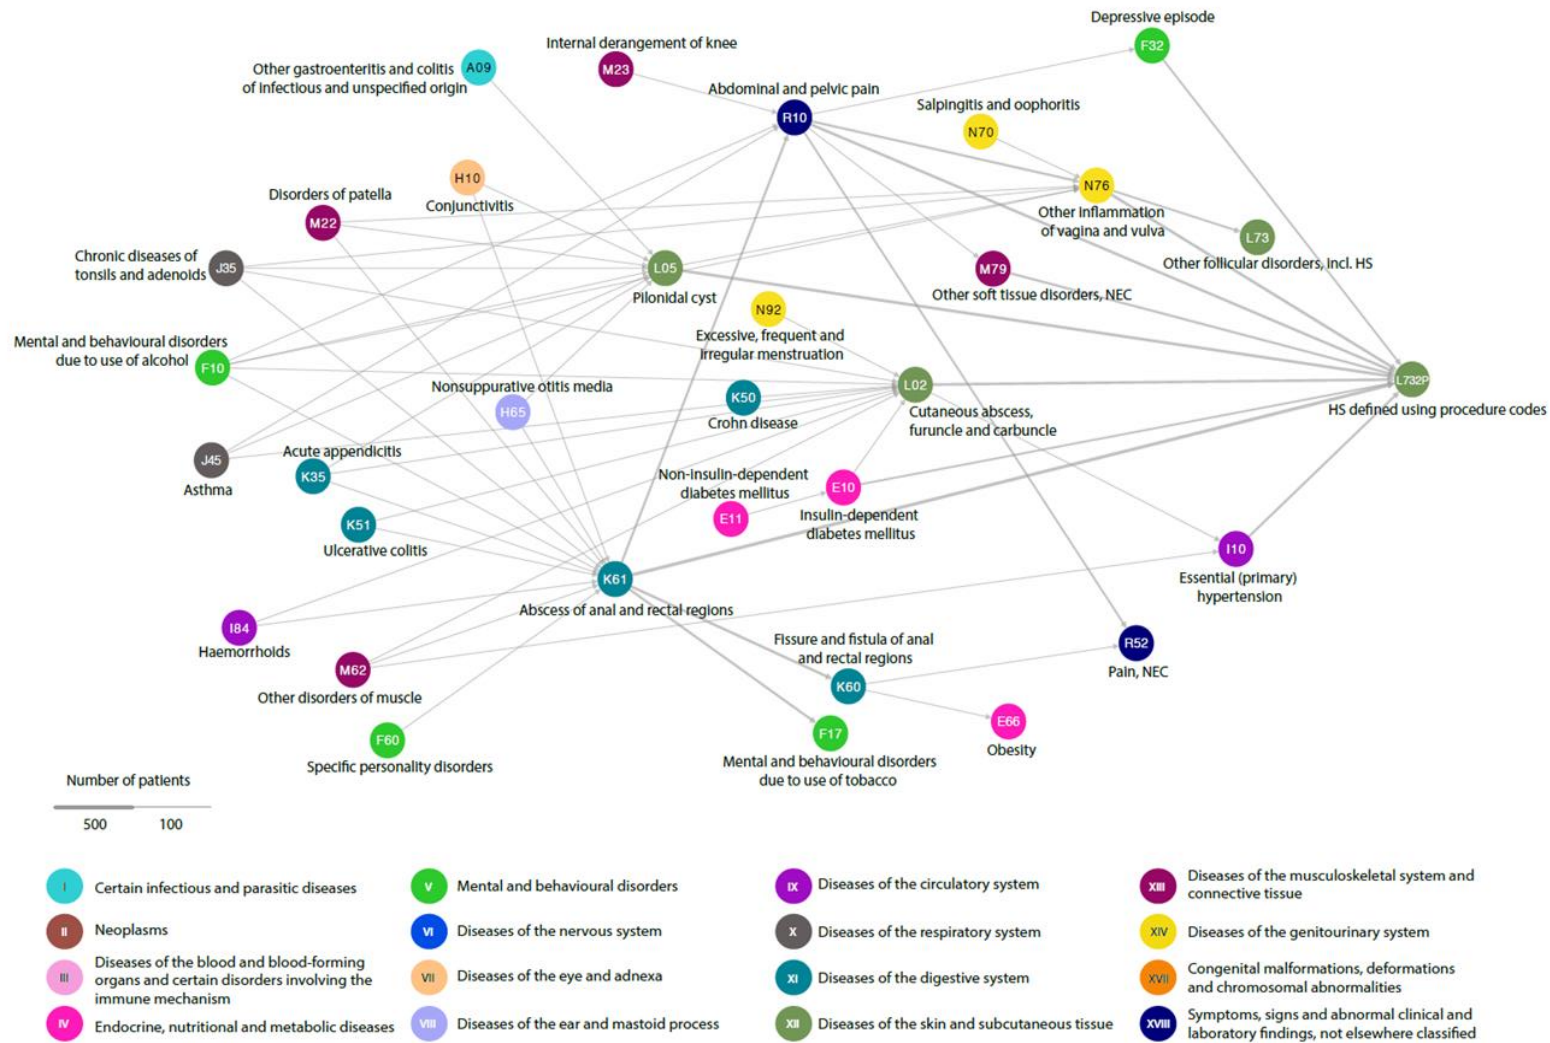

LEGEND: The temporal relationship of diseases experienced by patients with HS. All diseases that are part of the trajectory network are represented as orbs with the arrows connecting them representing the temporal manifestation and arrow width the number of patients following the trajectory.

**eFigure 3.** ICD10 HS Group Where the Diagnosis of HS Were Artificially Delayed by 6 Months

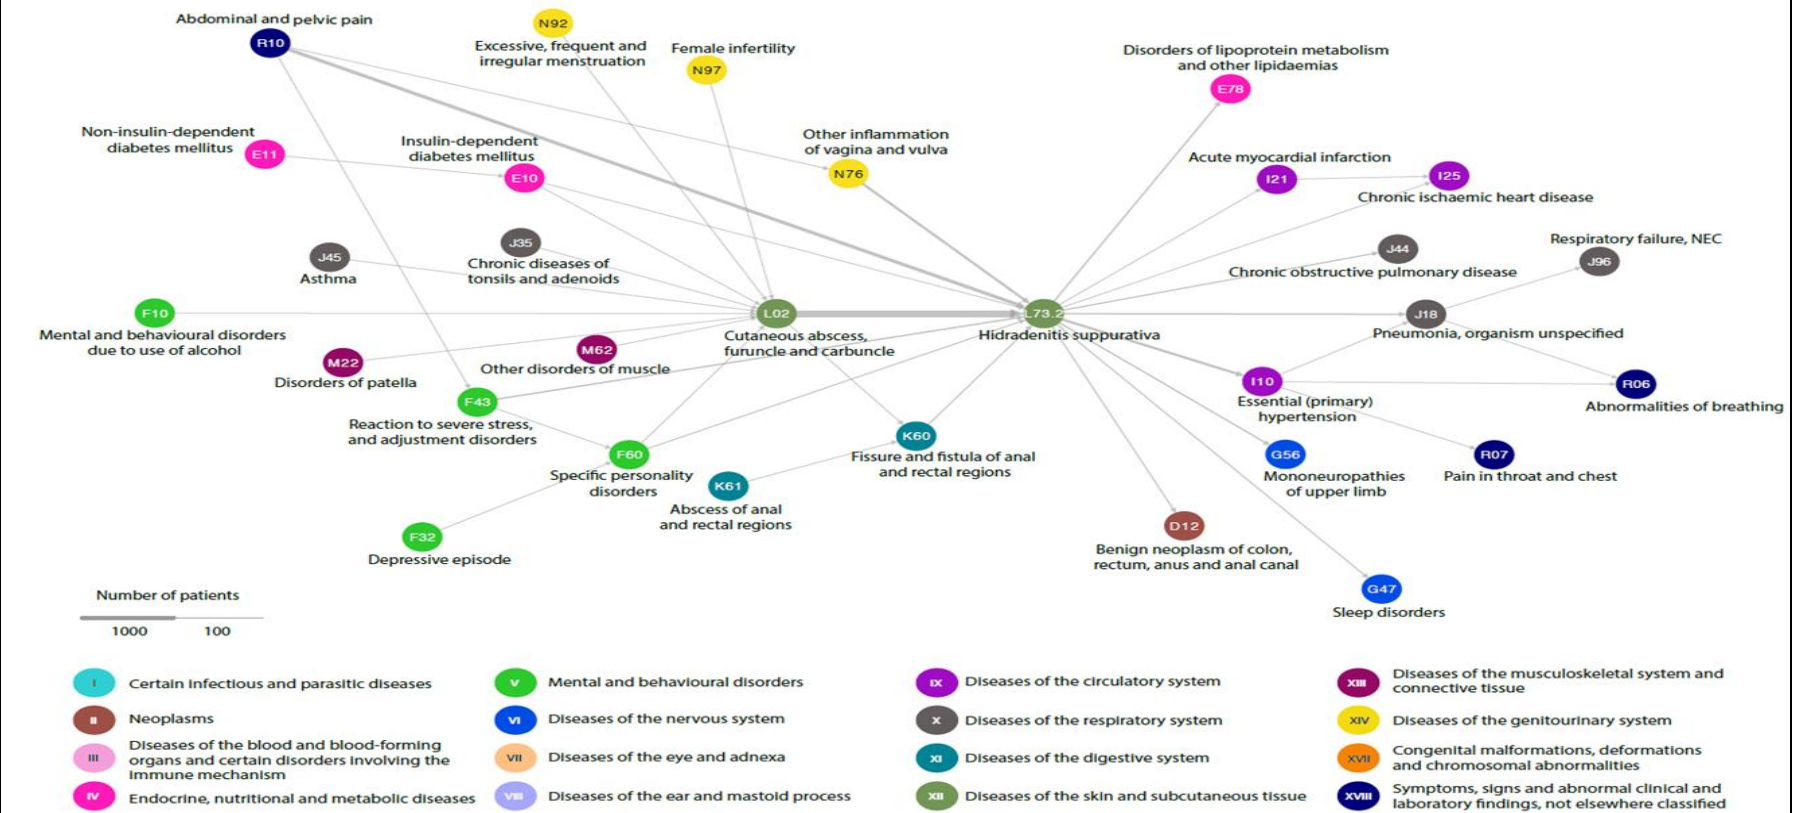

LEGEND: The temporal relationship of diseases experienced by patients with HS. The eFigure is similar to eFigure 1 but the time of HS diagnosis have been delayed 6 months to make comparison with the trajectories found in eFigure 2 easier.
